# Supplementary material for: Licorice-root extract and potassium sorbate spray improved the yield and fruit quality and decreased heat stress of the ‘osteen’ mango cultivar
Source: PeerJ journal article supplement (doi:10.7717/peerj.18200), 2024-10-07
Supplement: Raw_data.xlsx [file Raw_data.xlsx]

## Sheet: Means
Heat stress					Leaf area (cm2)				Proline Mg/100 F.W				Number of fruits/tree					Fruit weight (g)				Yield component per tree(Kg)				TSS (Brix˚)				Total acidity %				TSS/acid ratio							Chl A (mg/g F.wt.)				Chl B (mg/g F.wt.)				Chl A+B (mg/g F.wt.)
Treatment	2022		2023		2022		2023		2022		2023		2022			2023		2022		2023		2022		2023		2022		2023		2022		2023									2022		2023		2022		2023		2022
	No. of harmed fruits				2022 season		2023 season		2022 season		2023 season	Treatments	2022 season			2023 season	Treatments	2022 season		2023 season	Treatments	2022 season		2023 season	Treatments	2022 season		2023 season	Treatments	2022 season		2023 season	Treatments	2022 season		2023 season				Treatments	2022 season		2023 season	Treatments	2022 season		2023 season	Treatments	2022 season
Control	13.3333		26	Control	45.57		48.08	Control	0.279267		0.1949	Control	34.3333			40.6667	Control	352.333		366	Control	12.0967		14.8867	Control	16.3		17.36	Control	0.916667		0.7	Control	17.7818		24.8				Control	0.567667		0.655	Control	0.286		0.248333	Control	0.853667
LRE2	3		6	LRE2	50.8567		57.5067	LRE2	0.120533		0.1006	LRE2	69.3333			75.6667	LRE2	401.667		416.333	LRE2	27.85		33.55	LRE2	19.8667		21.0333	LRE2	0.5		0.433333	LRE2	39.7333		48.5385				LRE2	0.895		0.861667	LRE2	0.434333		0.417333	LRE2	1.32533
LRE4	2.66667		2	LRE4	63.89		73.5933	LRE4	0.0653		0.0510567	LRE4	85			91.3333	LRE4	408.333		421.667	LRE4	39.1333		43.4567	LRE4	22.37		24.3467	LRE4	0.333333		0.233333	LRE4	67.11		104.343				LRE4	1.263		1.33967	LRE4	0.730667		0.715667	LRE4	1.86433
LRE6	1.33333		0.666667	LRE6	83.3133		89.98	LRE6	0.0268		0.0259667	LRE6	100			105	LRE6	489.333		503	LRE6	48.7167		51.1033	LRE6	25.8667		27.1633	LRE6	0.233333		0.133333	LRE6	110.857		203.725				LRE6	1.35667		1.389	LRE6	0.899		0.877667	LRE6	2.189
PS1	5		7	PS1	38.6733		40.9533	PS1	0.129667		0.135	PS1	60			70	PS1	375		384	PS1	22.5167		26.8833	PS1	18.8667		19.3667	PS1	0.6		0.5	PS1	31.4444		38.7333				PS1	0.602667		0.572	PS1	0.312333		0.310667	PS1	0.915
PS2	3.33333		3.66667	PS2	52.6167		57.9	PS2	0.063		0.0545	PS2	80			87	PS2	396.667		407.667	PS2	31.8		35.4567	PS2	21.0367		22.68	PS2	0.366667		0.266667	PS2	57.3727		85.05				PS2	0.891		0.888667	PS2	0.423		0.422667	PS2	1.318
PS3	1.66667		1.33333	PS3	70.9967		78.01	PS3	0.0301333		0.0334667	PS3	92.6667			98	PS3	415		430	PS3	40.7933		48.7967	PS3	23.8667		25.1633	PS3	0.333333		0.233333	PS3	71.6		107.843				PS3	1.089		1.10967	PS3	0.775667		0.759333	PS3	1.99367
				yield increase
				Control	0		0
				LRE2	130.821		128.792
				LRE4	225.667		195.341
				LRE6	305.778		246.518
				PS1	86.5703		81.1517
				PS2	165.503		139.694
				PS3	242.544		232.445

## Sheet: Sheet1
Treatments	Replicts	FS yiel increasing percent			means		SS yiel increasing percent
Cont.	R1	0	0	0	0		0	0	0	0
T1	R1	141.429	121.417	129.619	130.821		143.194	74.7748	168.406	128.792
T2	R1	256.19	216.023	204.787	225.667		211.458	140.841	233.725	195.341
T3	R1	344.762	304.509	268.063	305.778		265.278	194.114	280.162	246.518
T4	R1	93.8095	81.1594	84.742	86.5703		73.75	74.7748	94.9302	81.1517
T5	R1	208.571	135.507	152.431	165.503		142.014	116.817	160.25	139.694
T6	R1	318.095	217.391	192.147	242.544		264.583	155.676	277.076	232.445
Cont.	R2
T1	R2
T2	R2
T3	R2
T4	R2
T5	R2
T6	R2
Cont.	R3
T1	R3
T2	R3
T3	R3
T4	R3
T5	R3
T6	R3

## Sheet: Replictes
Treatments	Replicts	No. of harmed fruits	No. of harmed fruits	Leaf area (cm2)	Leaf area (cm2)	Proline Mg/100 F.W	Proline Mg/100 F.W	Number of Fruits/tree	Number of Fruits/tree	Fruit weight (g)	Fruit weight (g)	Yield component per tree(Kg)	yiel increasing percent		Yield component per tree(Kg)	yiel increasing percent				T.S.S%	T.S.S%	Total acidity %	Total acidity %	TSS/acid ratio	TSS/acid ratio		Chl A (mg/g F.wt.)	Chl A (mg/g F.wt.)	Chl B (mg/g F.wt.)	Chl B (mg/g F.wt.)	Chl A+B (mg/g F.wt.)	Chl A+B (mg/g F.wt.)	Carotenoids (mg/g F.wt.)	Carotenoids (mg/g F.wt.)	Total pigments(mg/g F.wt.)	Total pigments(mg/g F.wt.)	Catalase (U/mg F.W)	Catalase (U/mg F.W)	Peroxidase (U/mg F.W)	Peroxidase (U/mg F.W)	Polyphenol oxidase (U/mg F.W)	Polyphenol oxidase (U/mg F.W)	Total phenolic (mg/g F.W)	Total phenolic (mg/g F.W)	Total Flavonoid (mg/g F.W)	Total Flavonoid (mg/g F.W)	VC %	VC %
Cont.	R1	12	25	43.21	45.21	0.2452	0.1954	30	40	350	360	10.5	0		14.4	0				16.25	17.58	1	0.7	16.25	25.1143		0.564	0.644	0.284	0.246	0.848	0.89	0.257	0.255	1.144	1.194	23.7594	28.8722	12.406	12.406	6.17647	7.64706	43.3955	43.3955	65.6192	65.6192	1.2	1.3
T1	R1	4	5	49.24	55.25	0.145	0.11	65	70	400	420	25.35	141.429		35.02	143.194				20.4	20.5	0.6	0.4	34	51.25		0.892	0.846	0.432	0.415	1.339	1.319	0.32	0.282	1.631	1.556	18.6466	21.5038	11.6541	12.406	2.94118	3.52941	31.9864	34.0318	48.6192	48.6192	1.5	1.6
T2	R1	3	2	59.24	70.12	0.0851	0.0421	80	90	405	410	37.4	256.19		44.85	211.458				23.21	25.5	0.3	0.2	77.3667	127.5		1.255	1.371	0.735	0.712	1.797	1.797	0.332	0.338	2.131	2.175	9.17293	10.6767	7.14286	8.27068	3.82353	4.41176	21.8955	25.9864	40.5808	44.4269	1.7	1.8
T3	R1	1	0	79.25	86.25	0.021	0.0187	105	100	550	550	46.7	344.762		52.6	265.278				27.4	28.41	0.2	0.1	137	284.1		1.448	1.253	0.916	0.879	2.164	2.132	0.428	0.436	2.508	2.465	9.92481	9.72932	5.26316	5.6391	2.94118	3.23529	17.1227	16.6682	25.2346	24.0808	2.1	2.2
T4	R1	4	7	35.25	40.21	0.138	0.14	55	65	370	385	20.35	93.8095		25.02	73.75				18.4	19.5	0.7	0.4	26.2857	48.75		0.596	0.579	0.312	0.318	0.908	0.897	0.296	0.304	1.165	1.152	15.3383	21.3534	10.9023	12.0301	5	4.70588	35.7591	34.85	62.1577	60.7346	1.3	1.4
T5	R1	3	2	45.24	55.31	0.01	0.121	80	85	405	410	32.4	208.571		34.85	142.014				20.21	22.5	0.4	0.3	50.525	75		0.907	0.904	0.419	0.428	1.311	1.274	0.334	0.378	1.671	1.657	16.391	17.1429	10.5263	10.1504	3.52941	3.23529	25.9864	27.1227	37.8885	45.5808	1.4	1.6
T6	R1	2	2	65.24	75.48	0.021	0.0212	90	100	410	425	43.9	318.095		52.5	264.583				23.4	25.41	0.4	0.3	58.5	84.7		1.043	1.141	0.755	0.756	1.99	1.983	0.344147	0.333218	2.418	2.419	6.91729	9.5188	6.76692	6.39098	3.52941	3.82353	19.8955	20.8045	32.9654	31.0423	1.7	1.9
Cont.	R2	13	27	45.87	48.25	0.2684	0.2021	35	45	355	370	12.42	0		16.65	0				17.25	18	0.95	0.6	18.1579	30		0.568	0.644	0.284	0.246	0.852	0.89	0.257	0.257	1.143	1.194	22.2556	20.7519	14.2857	18.0451	5	5.58824	51.7591	56.3045	68.0038	62.6192	1.4	1.4
T1	R2	2	6	50.35	56.82	0.1212	0.0894	70	78	425	450	27.5	121.417		29.1	74.7748				19.5	20.1	0.4	0.5	48.75	40.2		0.89	0.846	0.434	0.415	1.324	1.308	0.315	0.279	1.63	1.553	22.1053	20.3008	9.02256	9.77444	3.82353	4.41176	33.4409	34.4864	50.3115	46.4654	1.4	1.5
T2	R2	3	1	65.48	79.21	0.0754	0.0678	85	95	390	430	39.25	216.023		40.1	140.841				22.4	23.4	0.3	0.2	74.6667	117		1.27	1.37	0.725	0.725	1.87	1.791	0.334	0.336	2.205	2.131	13.6842	10.6767	13.1579	13.5338	2.64706	2.35294	24.2136	20.5773	42.2731	42.2731	1.5	1.7
T3	R2	2	1	83.24	90.45	0.034	0.0301	95	105	458	500	50.24	304.509		48.97	194.114				25.4	25.18	0.2	0.1	127	251.8		1.324	1.454	0.927	0.876	2.251	2.13	0.435	0.391	2.598	2.486	6.91729	7.5188	3.00752	3.38346	2.64706	2.35294	15.0773	13.7136	24.8115	24.0423	1.8	1.9
T4	R2	5	8	38.24	38.5	0.132	0.135	60	75	375	388	22.5	81.1594		29.1	74.7748				19.5	20.1	0.6	0.5	32.5	40.2		0.605	0.557	0.313	0.311	0.918	0.868	0.291	0.304	1.175	1.125	27.5188	24.0602	15.7895	15.7895	4.11765	4.70588	31.5318	34.7136	64.1962	64.5808	1.5	1.6
T5	R2	4	5	55.27	60.48	0.09	0.0125	75	87	390	415	29.25	135.507		36.1	116.817				22.4	23.4	0.3	0.2	74.6667	117		0.89	0.893	0.425	0.428	1.315	1.274	0.335	0.34	1.658	1.644	15.6391	15.4887	10.9023	14.6617	3.52941	4.11765	26.35	27.1682	43.2346	42.85	1.6	1.7
T6	R2	2	1	70.54	80.21	0.034	0.0301	95	99	415	430	39.42	217.391		42.57	155.676				25.4	25.18	0.2	0.2	127	125.9		1.095	1.059	0.775	0.762	1.995	1.995	0.346727	0.356085	2.43	2.386	9.77444	10.9774	8.64662	9.02256	2.94118	2.64706	20.0773	20.5318	36.9654	30.8115	1.8	1.8
Cont.	R3	15	26	47.63	50.78	0.3242	0.1872	38	37	352	368	13.37	0		13.61	0				15.4	16.5	0.8	0.8	19.25	20.625		0.571	0.677	0.29	0.253	0.861	0.93	0.258	0.26	1.15	1.232	23.0075	24.812	16.5414	16.5414	7.35294	7.05882	53.2136	52.3045	67.0808	66.3115	1.3	1.3
T1	R3	3	7	52.98	60.45	0.0954	0.1024	73	79	380	379	30.7	129.619		36.53	168.406				19.7	22.5	0.5	0.4	39.4	56.25		0.903	0.893	0.437	0.422	1.313	1.291	0.317	0.286	1.645	1.591	20.3759	20.9023	10.3383	11.0902	4.11765	4.11765	32.35	34.9409	49.5038	49.5038	1.5	1.5
T2	R3	2	3	66.95	71.45	0.0354	0.04327	90	89	430	425	40.75	204.787		45.42	233.725				21.5	24.14	0.4	0.3	53.75	80.4667		1.264	1.278	0.732	0.71	1.926	1.789	0.335	0.336	2.246	2.123	11.4286	10.6767	9.02256	8.27068	3.23529	3.38235	21.8955	22.35	44.3115	44.3115	1.6	1.6
T3	R3	1	1	87.45	93.24	0.0254	0.0291	100	110	460	459	49.21	268.063		51.74	280.162				24.8	27.9	0.3	0.2	82.6667	139.5		1.298	1.46	0.854	0.878	2.152	2.138	0.436	0.4	2.525	2.48	8.42105	9.62406	7.89474	8.64662	2.94118	2.64706	16.4409	15.9864	23.9654	23.9654	2	2.1
T4	R3	6	6	42.53	44.15	0.119	0.13	65	70	380	379	24.7	84.742		26.53	94.9302				18.7	18.5	0.5	0.6	37.4	30.8333		0.607	0.58	0.312	0.303	0.919	0.883	0.289	0.302	1.177	1.143	21.4286	22.7068	10.9023	8.27068	4.55882	4.70588	37.0318	32.0318	63.3115	64.5808	1.4	1.6
T5	R3	3	4	57.34	57.91	0.089	0.03	85	89	395	398	33.75	152.431		35.42	160.25				20.5	22.14	0.4	0.3	51.25	73.8		0.876	0.869	0.425	0.412	1.328	1.305	0.32	0.334	1.648	1.627	16.015	16.3158	9.77444	6.76692	3.52941	3.67647	26.3045	26.9864	43.8885	43.5038	1.4	1.5
T6	R3	1	1	77.21	78.34	0.0354	0.0491	93	95	420	435	39.06	192.147		51.32	277.076				22.8	24.9	0.4	0.2	57	124.5		1.129	1.129	0.797	0.76	1.996	1.988	0.373142	0.3421	2.432	2.388	8.34586	9.24812	5.6391	6.76692	2.94118	3.23529	20.5773	20.1227	33.9654	33.1962	1.6	1.9
Treatments	Replicts	TSS/acid ratio	TSS/acid ratio																			Treatments	2022 season					2023 season
Cont.	R1	16.25	25.1143
T1	R1	34	51.25
T2	R1	77.3667	127.5
T3	R1	137	284.1
T4	R1	26.2857	48.75
T5	R1	50.525	75
T6	R1	58.5	84.7
Cont.	R2	18.1579	30
T1	R2	48.75	40.2
T2	R2	74.6667	117
T3	R2	127	251.8
T4	R2	32.5	40.2
T5	R2	74.6667	117
T6	R2	127	125.9
Cont.	R3	19.25	20.625
T1	R3	39.4	56.25
T2	R3	53.75	80.4667
T3	R3	82.6667	139.5
T4	R3	37.4	30.8333
T5	R3	51.25	73.8
T6	R3	57	124.5
Treatments	Replicts	FS yiel increasing percent	SS yiel increasing percent
Cont.	R1	0	0
T1	R1	141.429	143.194
T2	R1	256.19	211.458
T3	R1	344.762	265.278
T4	R1	93.8095	73.75
T5	R1	208.571	142.014
T6	R1	318.095	264.583
Cont.	R2	0	0
T1	R2	121.417	74.7748
T2	R2	216.023	140.841
T3	R2	304.509	194.114
T4	R2	81.1594	74.7748
T5	R2	135.507	116.817
T6	R2	217.391	155.676
Cont.	R3	0	0
T1	R3	129.619	168.406
T2	R3	204.787	233.725
T3	R3	268.063	280.162
T4	R3	84.742	94.9302
T5	R3	152.431	160.25
T6	R3	192.147	277.076
